# Supplementary material for: miRNA Genes of an Invasive Vector Mosquito, Aedes albopictus
Source: PubMed Central journal article supplement (PMC3698096; doi:10.1371/journal.pone.0067638), 2013-07-01
Supplement: pone.0067638.s002.pdf [file pone.0067638.s002.pdf]

**Figure S2. Color-coded gene ontology (GO) graph showing significantly enriched GO terms describing molecular functions.** Predicted targets of miRNAs within each cluster (Figure 4) were analyzed separately. A false discovery rate (FDR) of 0.01 was used as the threshold. For each GO term, a brief description, GO number, FDR and P value were shown. No GO term was significantly enriched for targets of miRNAs in cluster 3 at a FDR of 0.01.

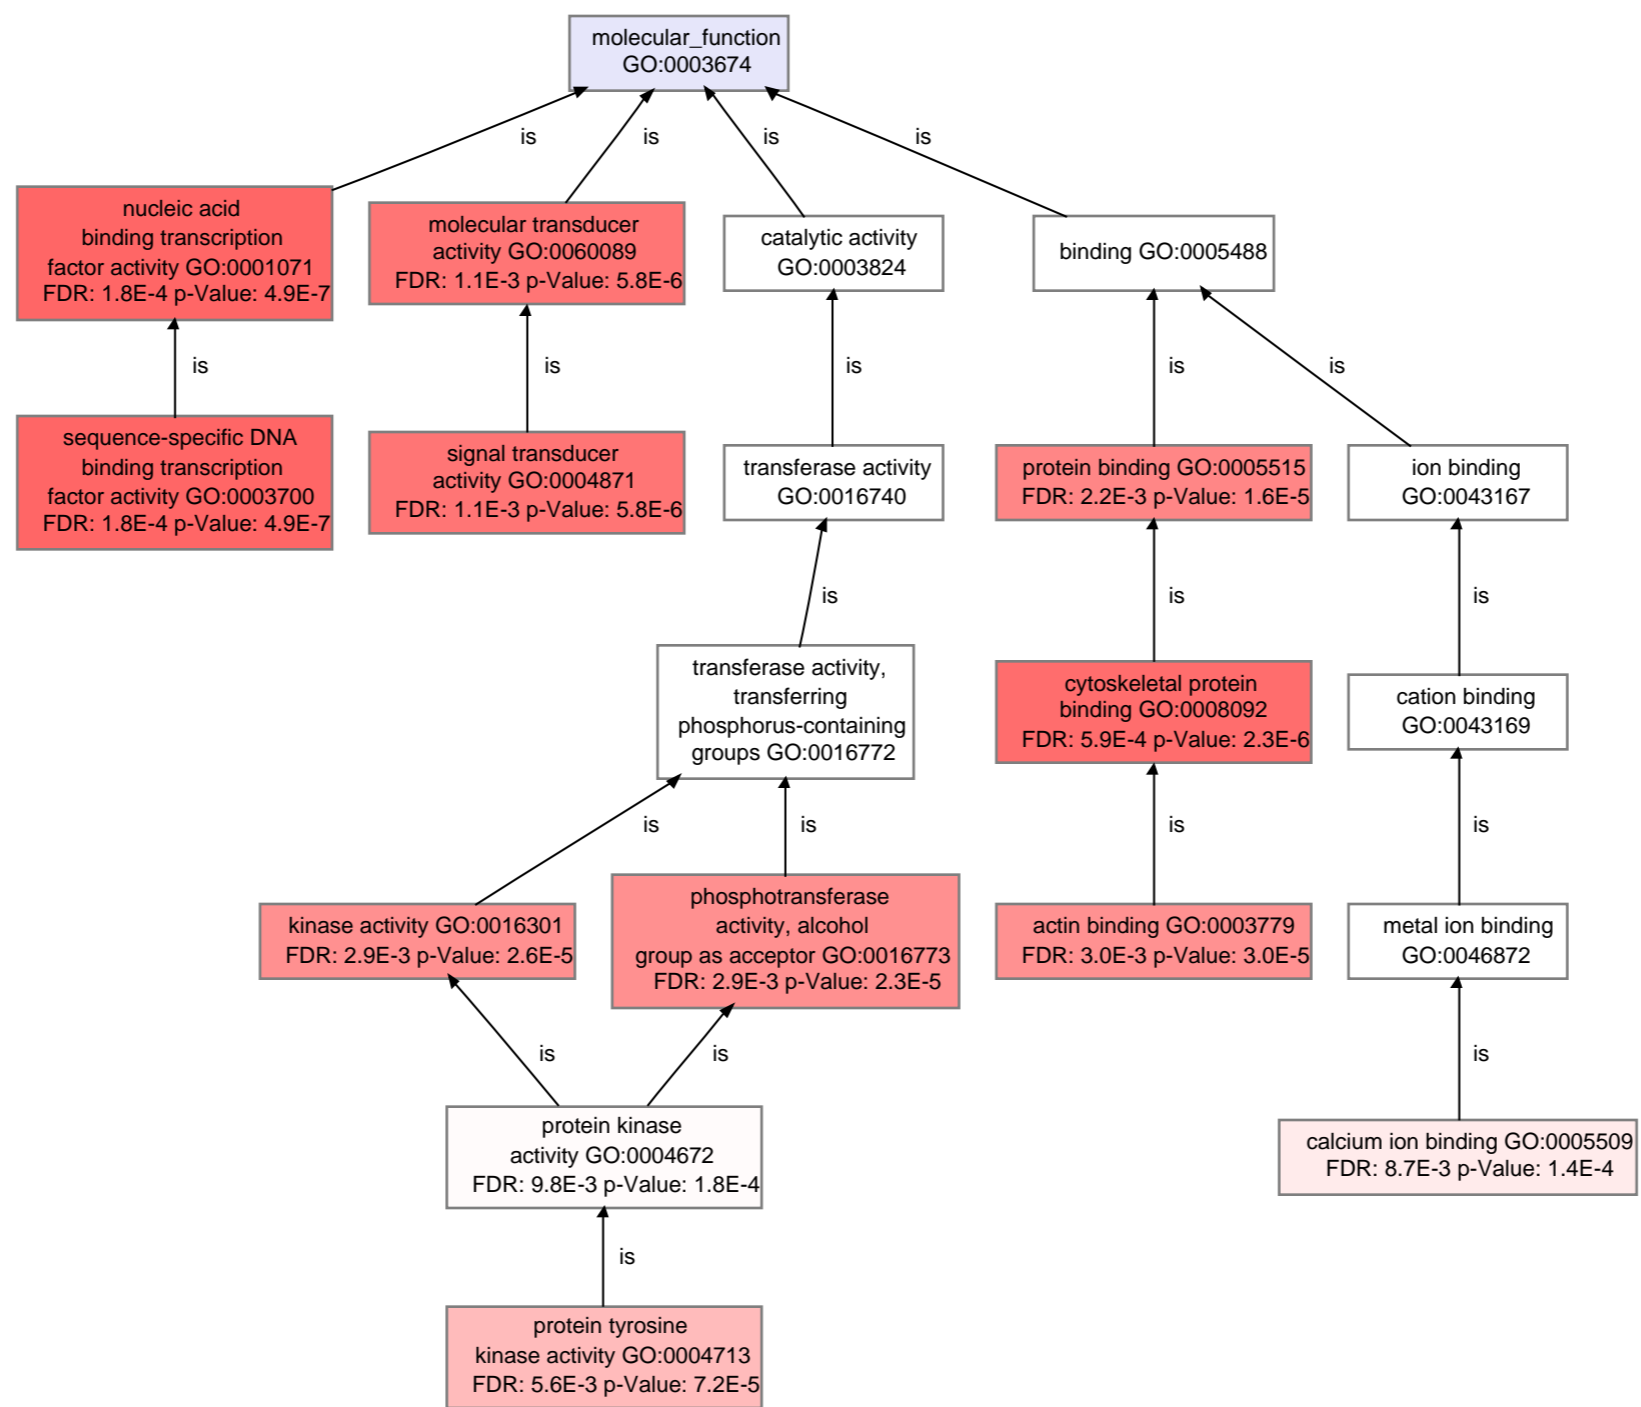

Enriched Graph

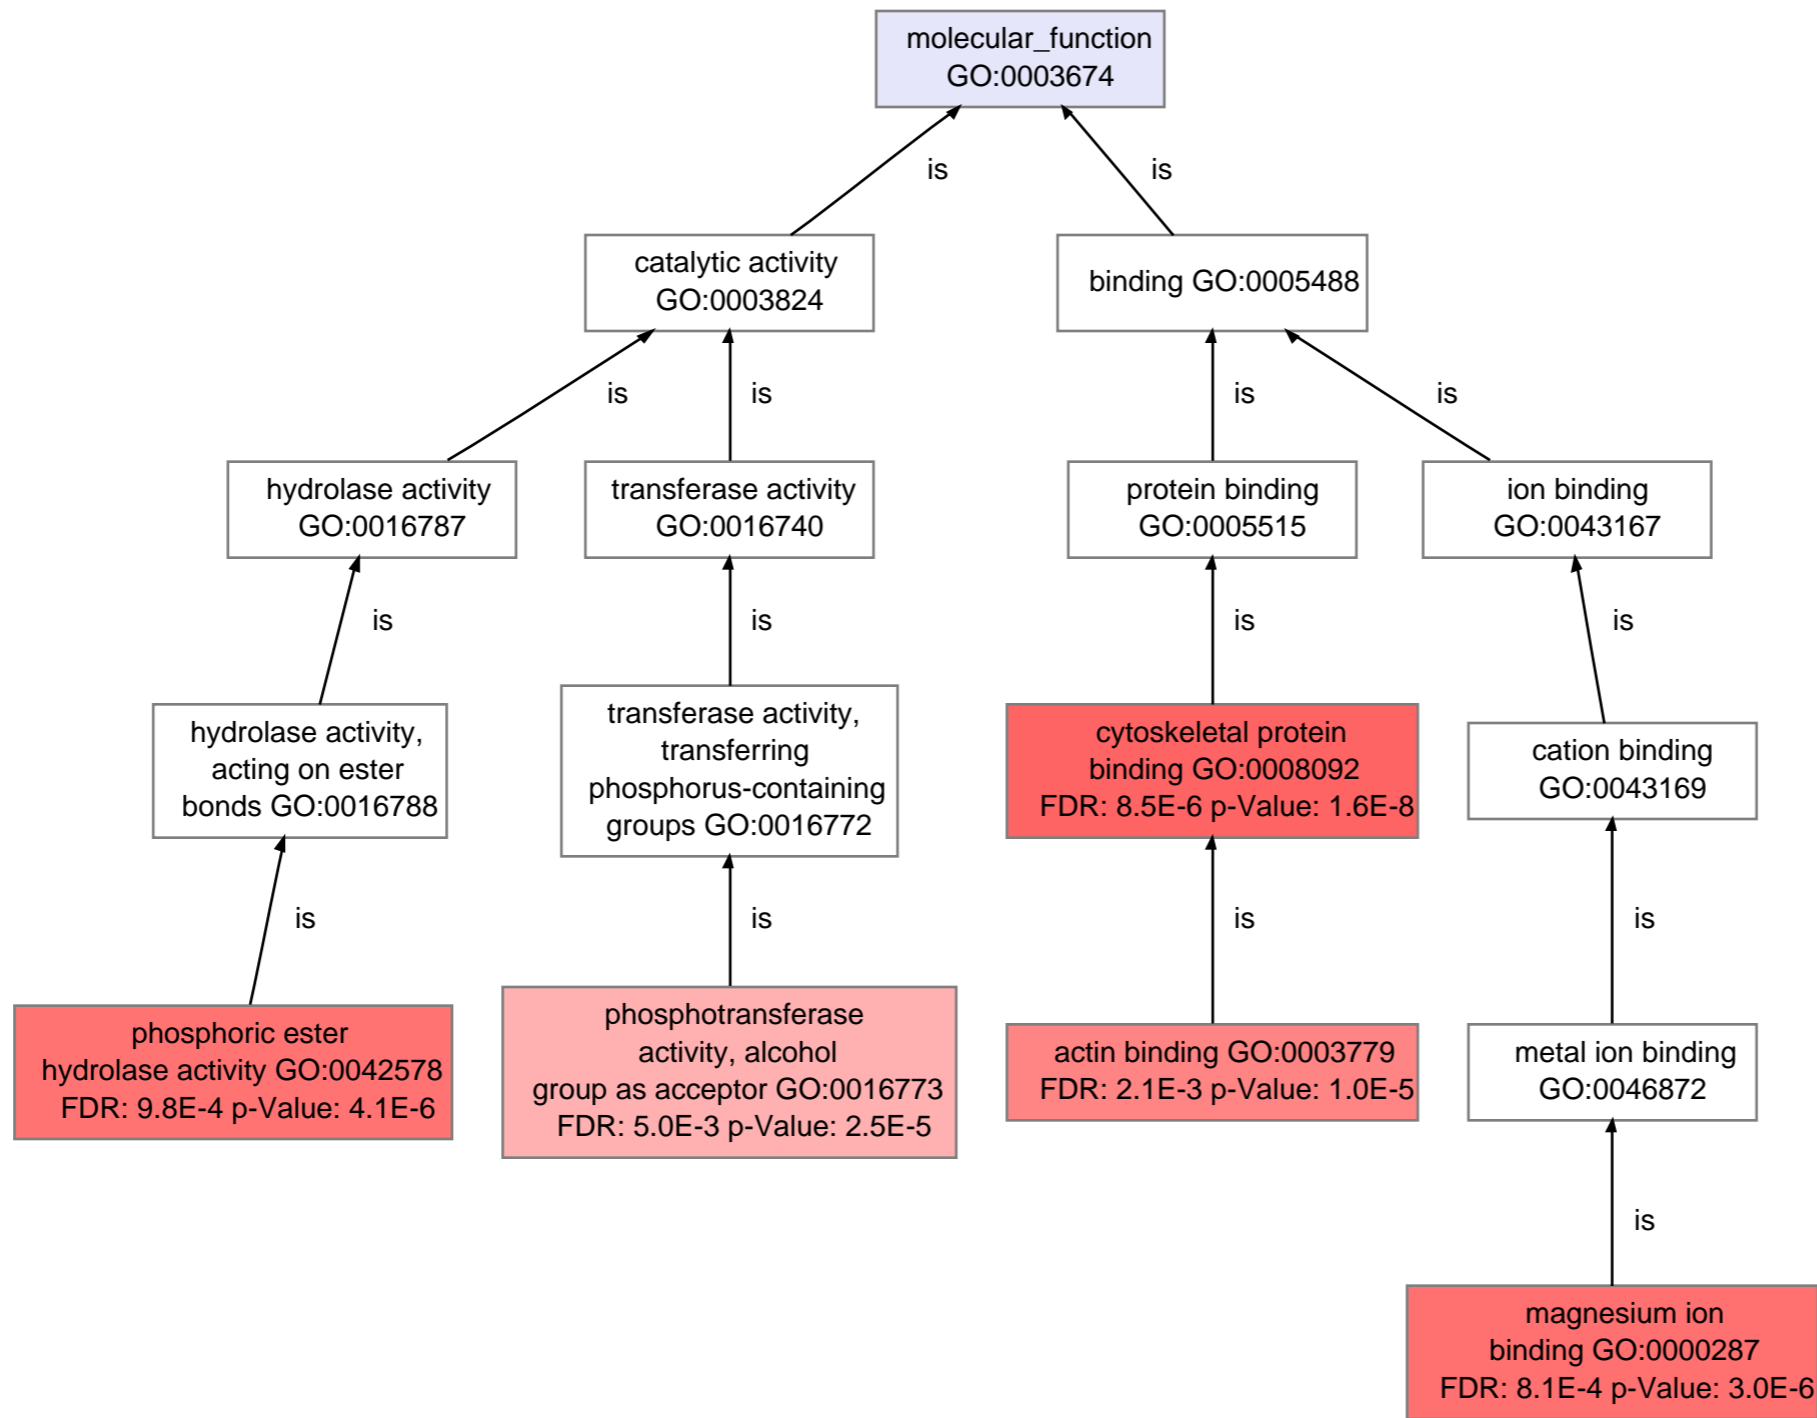

Enriched Graph

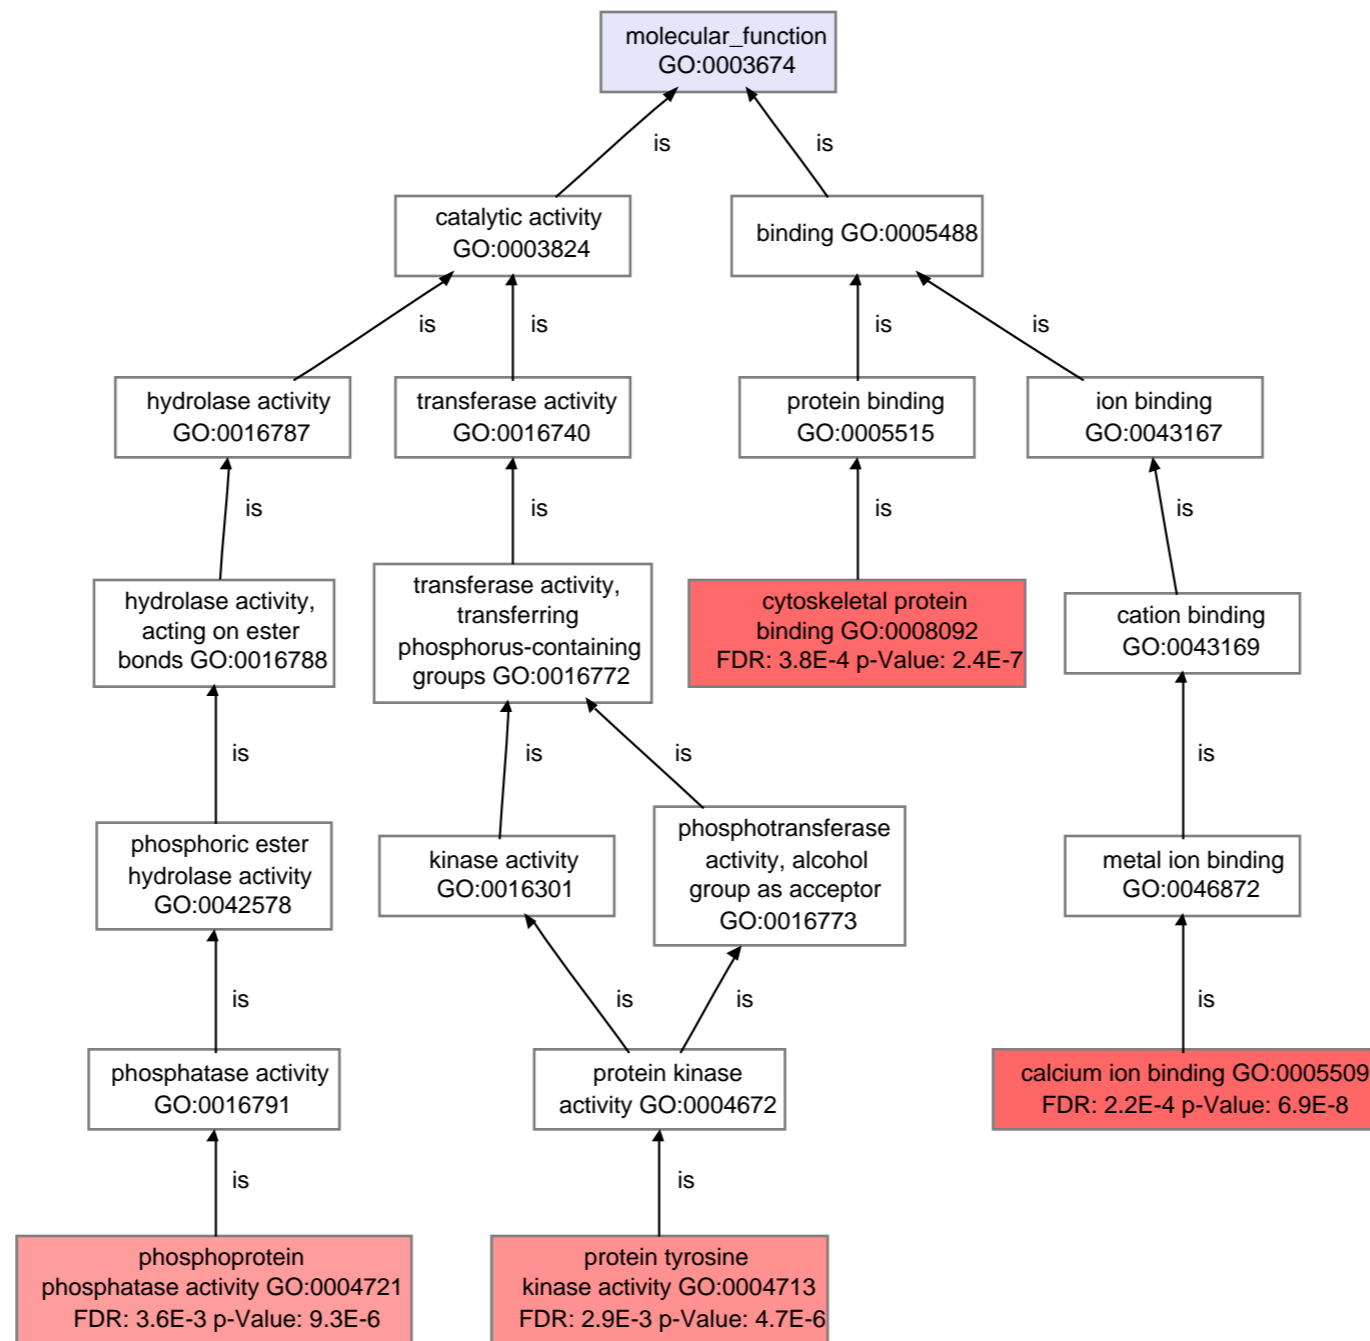

Enriched Graph

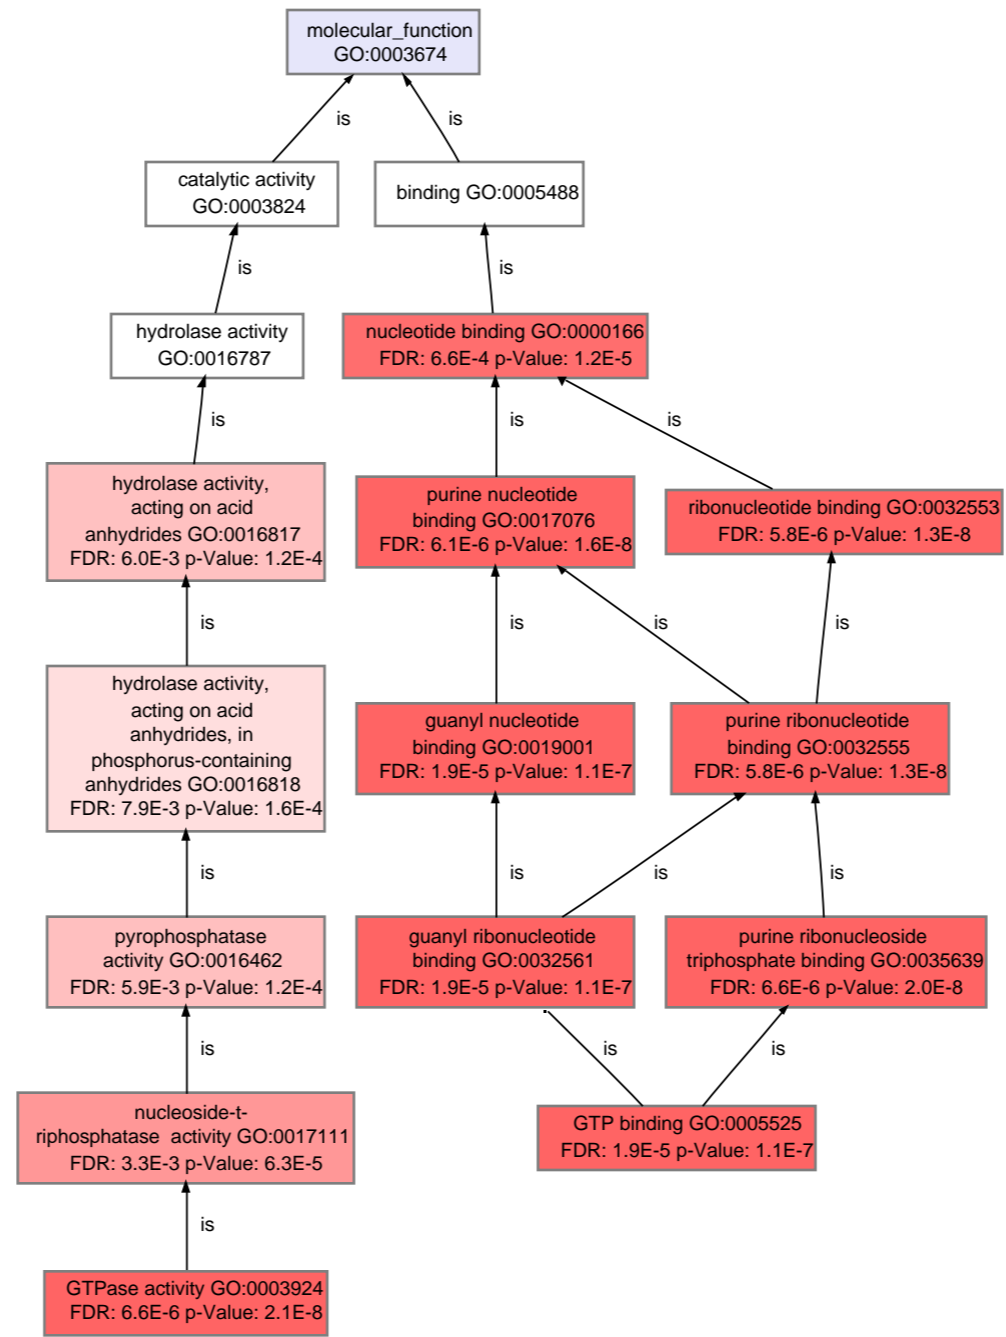

Enriched Graph
